# Supplementary material for: A solid oxide cell yielding high power density below 600 °C
Source: Royal Society of Chemistry journal article supplement (doi:10.1039/c2ra20413d), 2012-01-01
Supplement: c2ra20413d.pdf [file c2ra20413d.pdf]

## **A Solid Oxide Cell Yielding High Power Density Below 600°C**

Zhongliang Zhan,<sup>\*a</sup> Da Han,<sup>a</sup> Tianzhi Wu,<sup>a</sup> Xiaofeng Ye,<sup>a</sup> Shaorong Wang,<sup>a</sup> Tinglian Wen,<sup>a</sup> Sungmee Cho<sup>b</sup> and Scott A Barnett<sup>b</sup>

<sup>a</sup> *CAS Key Laboratory of Materials for Energy Conversion, Shanghai Institute of Ceramics, Chinese Academy of Sciences (SICCAS), 1295 Dingxi Road, Shanghai 200050, P. R. China.  
Fax: 86-21-6998-7669; Tel: 86-21-6998-7669; E-mail: [zzhan@mail.sic.ac.cn](mailto:zzhan@mail.sic.ac.cn)*

<sup>b</sup> *Department of Materials Science and Engineering, Northwestern University, 2220 Campus Drive, Evanston IL, 60208 USA*

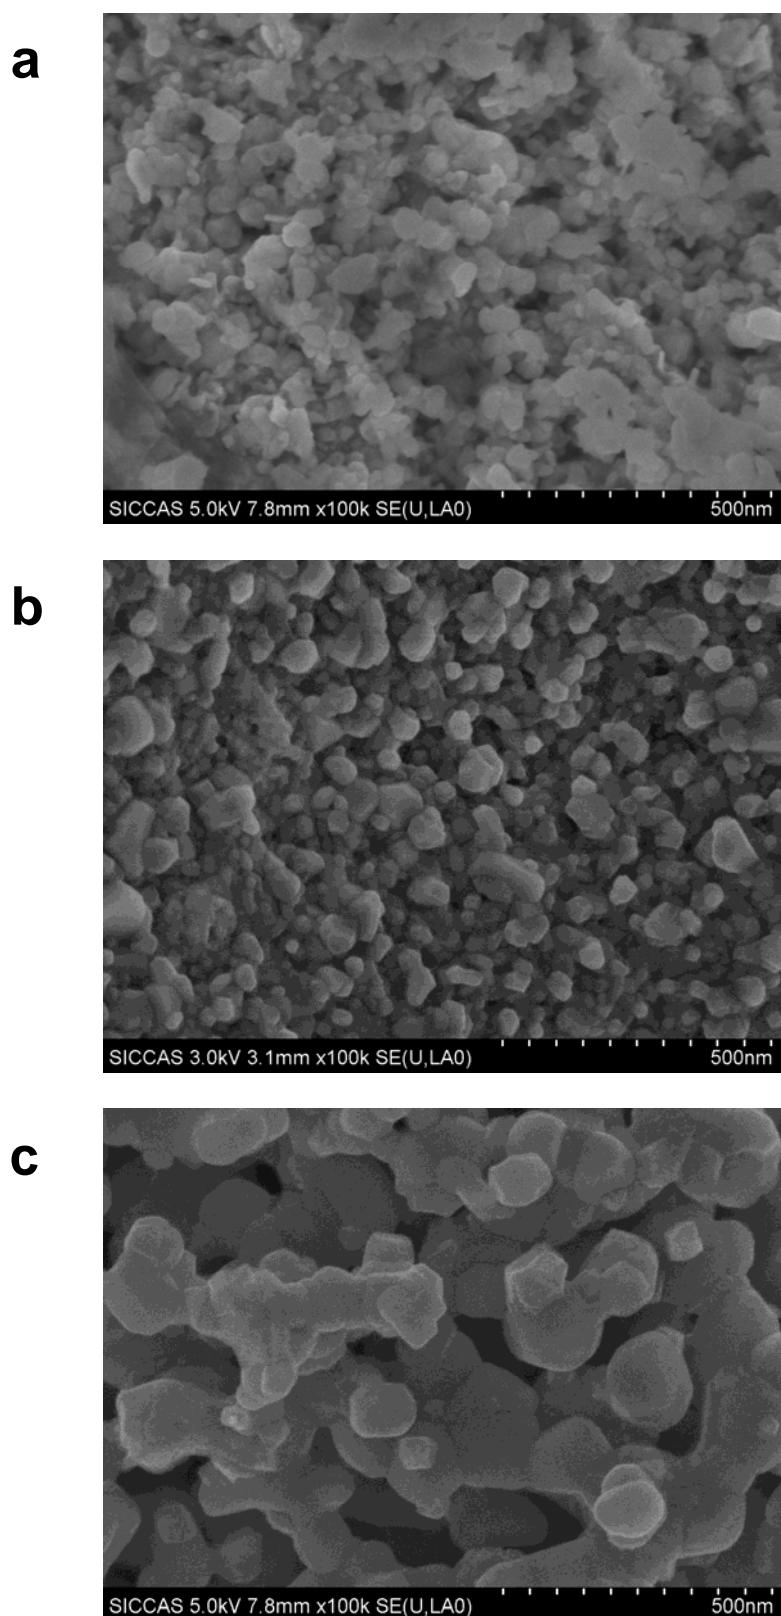

**Fig. S1** SEM images showing the nanoporous electrode coatings: (a) Ni anodes at  $V = 7.2\%$ , (b) SSC-SDC cathodes at  $V = 12.9\%$ , and (c) SSC cathodes at  $V = 12.9\%$ .

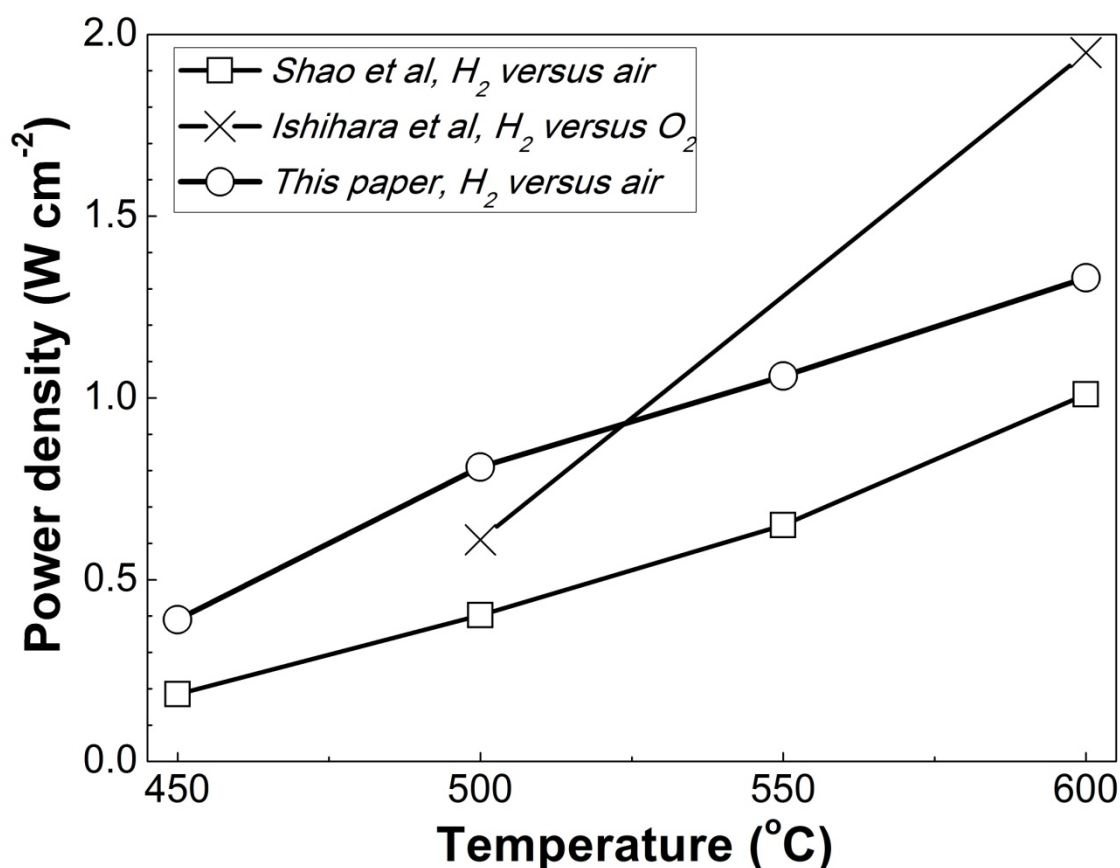

**Fig. S2** Maximum power densities as a function of temperature for different low-temperature fuel cells. Under similar operating conditions, the present thin LSGM electrolyte fuel cells yielded much higher power densities than thin Sm-doped Ceria (SDC) electrolyte fuel cells reported by Shao *et al*<sup>1</sup>, which can be ascribed to higher catalytic activities of the present dual-scale cathode structure that yields lower  $R_p$ , *e.g.*,  $0.075\ \Omega\ cm^2$  for the present SSC-SDC cathodes versus  $0.2\ \Omega\ cm^2$  for  $(Ba,Sr)(Co,Fe)O_3$  cathodes at  $550^\circ C$ <sup>1</sup>. Note that these SDC electrolyte cells also yielded relatively low open-circuit potentials. The present cells yielded higher power density than the pulsed laser deposited LSGM/SDC bi-layer electrolyte cells reported by Yan *et al*, except at  $600^\circ C$ <sup>2,3</sup>. However, their high power density resulted from the use of oxygen as the oxidant, which invariably enhances cathode performance, compared to air; when the present cells were tested with oxygen, a comparable maximum power density of  $1.85\ W\ cm^{-2}$  at  $600^\circ C$  was achieved.

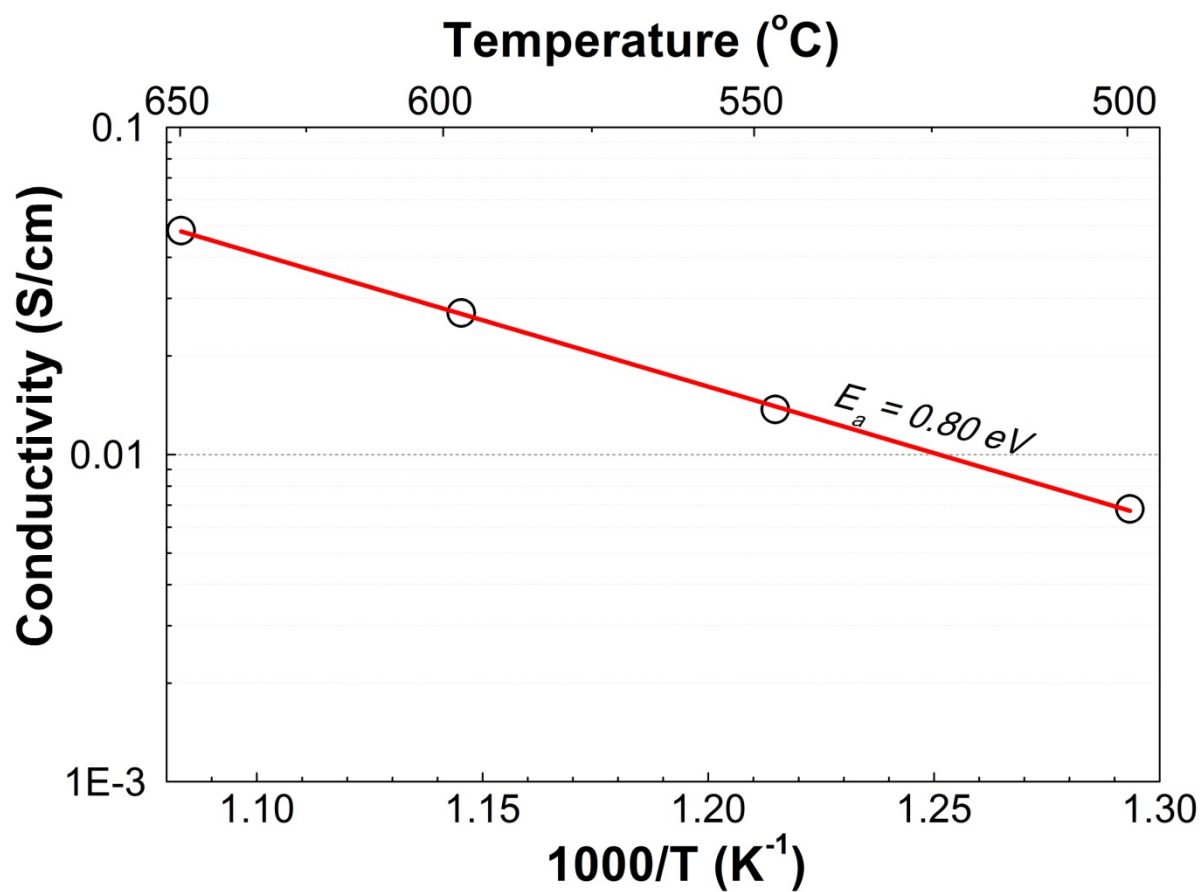

**Fig. S3** Conductivity of a bulk LSGM electrolyte versus inverse temperature. The activation energy for the oxide ion conduction was estimated to be 0.80 eV.

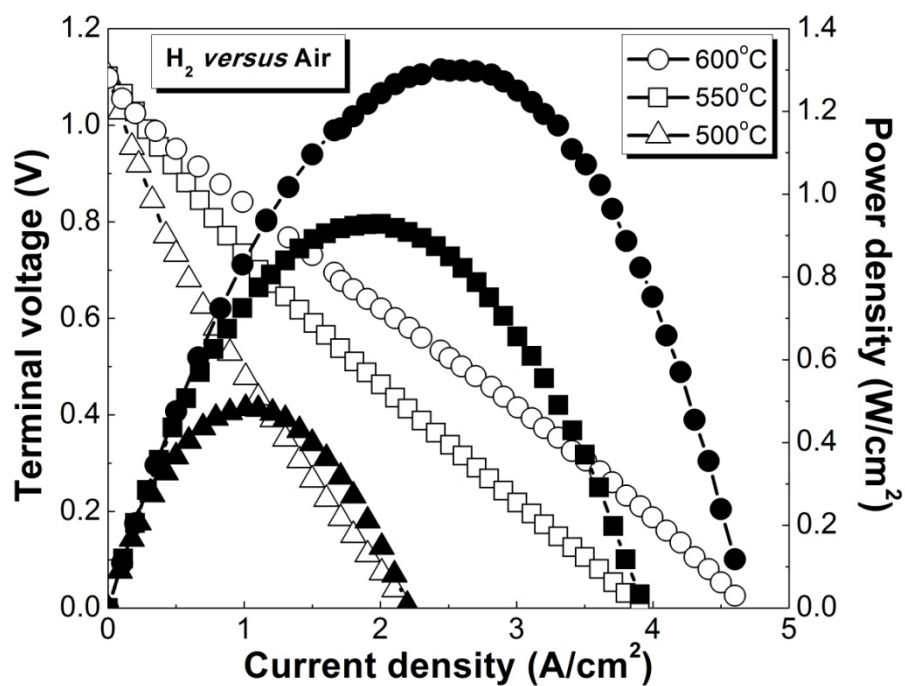

**Fig. S4** Current-voltage characteristics of a thin LSGM electrolyte fuel cell with  $V_{Ni} = 7.2\%$  and  $V_{SSC} = 12.9\%$ , operated on humidified hydrogen and ambient air at 500-600°C.

## References

- 1 Shao, Z. P. & Haile, S. M. A high-performance cathode for the next generation of solid-oxide fuel cells. *Nature* **431**, 170-173 (2004).
- 2 Yan, J., Matsumoto, H., Akbay, T., Yamada, T. & Ishihara, T. Preparation of LaGaO<sub>3</sub>-based perovskite oxide film by a pulsed-laser ablation method and application as a solid oxide fuel cell electrolyte. *Journal of Power Sources* **157**, 714-719 (2006).
- 3 Yan, J. W., Matsumoto, H., Enoki, M. & Ishihara, T. High-power SOFC using La<sub>0.9</sub>Sr<sub>0.1</sub>Ga<sub>0.8</sub>Mg<sub>0.2</sub>O<sub>3-δ</sub>/Ce<sub>0.8</sub>Sm<sub>0.2</sub>O<sub>2-δ</sub> composite film. *Electrochem Solid St* **8**, A389-A391 (2005).
